# Supplementary material for: Knockdown of PSMC2 contributes to suppression of cholangiocarcinoma development by regulating CDK1
Source: publisher site journal article supplement (doi:10.18632/aging.203463), 2021-09-09
Supplement: Supplementary file [file aging-v13i17-203463-supplementary-material-SD1.pdf]

## SUPPLEMENTARY FIGURES

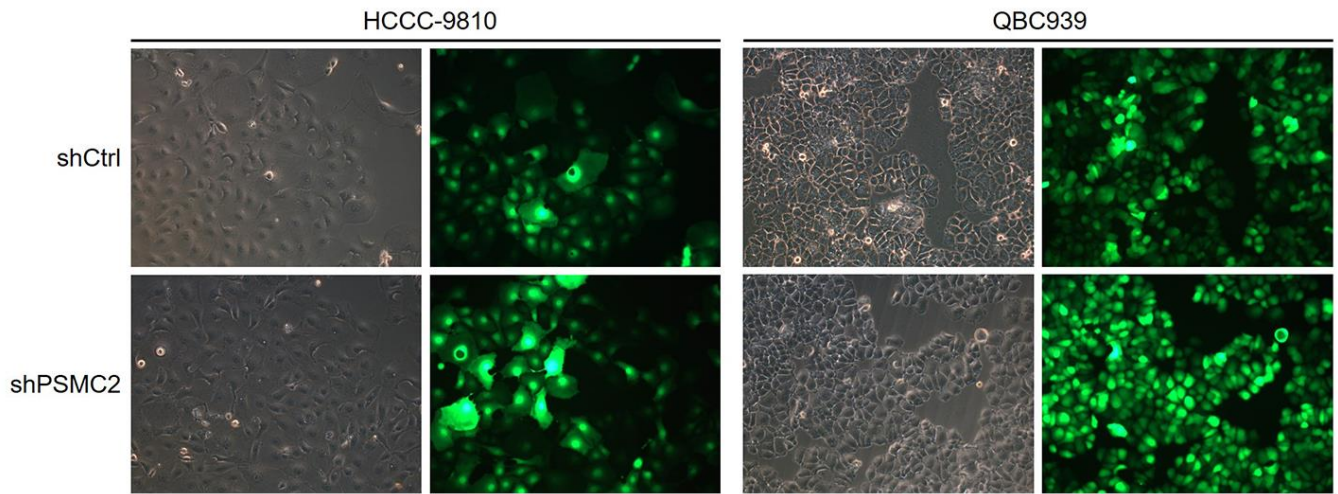

**Supplementary Figure 1.** The transfection efficiencies of shPSMC2 and shCtrl in HCCC-9810 and QBC939 cells were evaluated through observing the fluorescence of GFP on lentivirus vector.

**A**

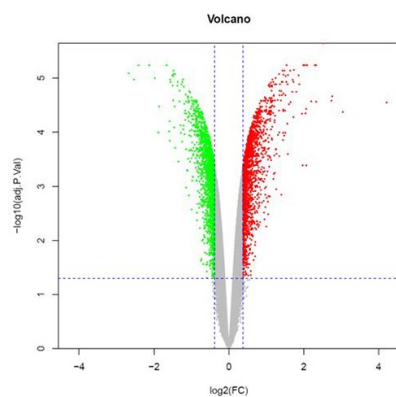

**B**

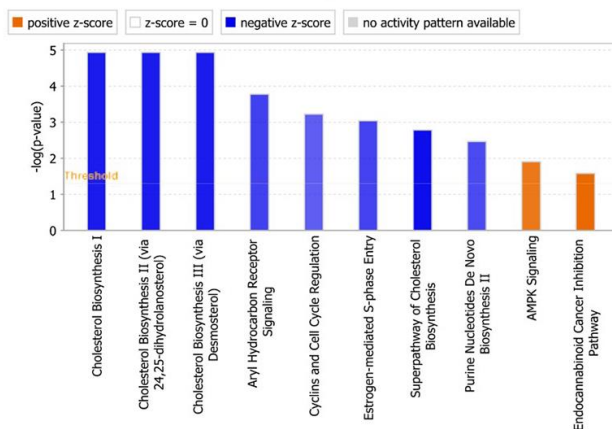

**C**

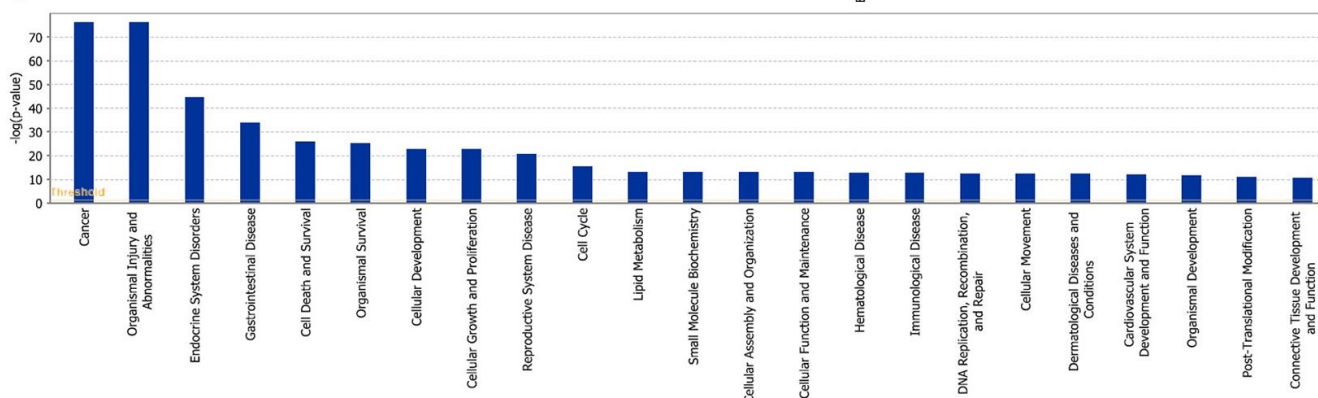

**Supplementary Figure 2.** (A) The volcano plot of gene expression profiling in HCCC-9810 cells with or without PSMC2 knockdown. Red dots represented significantly upregulated DEGs. Green dots represented significantly downregulated DEGs. (B) The enrichment of the DEGs in canonical signaling pathways was analyzed by IPA. (C) The enrichment of the DEGs in IPA disease and function was analyzed by IPA. Data was shown as mean  $\pm$  SD. \* $P < 0.05$ , \*\* $P < 0.01$ , \*\*\* $P < 0.001$ .

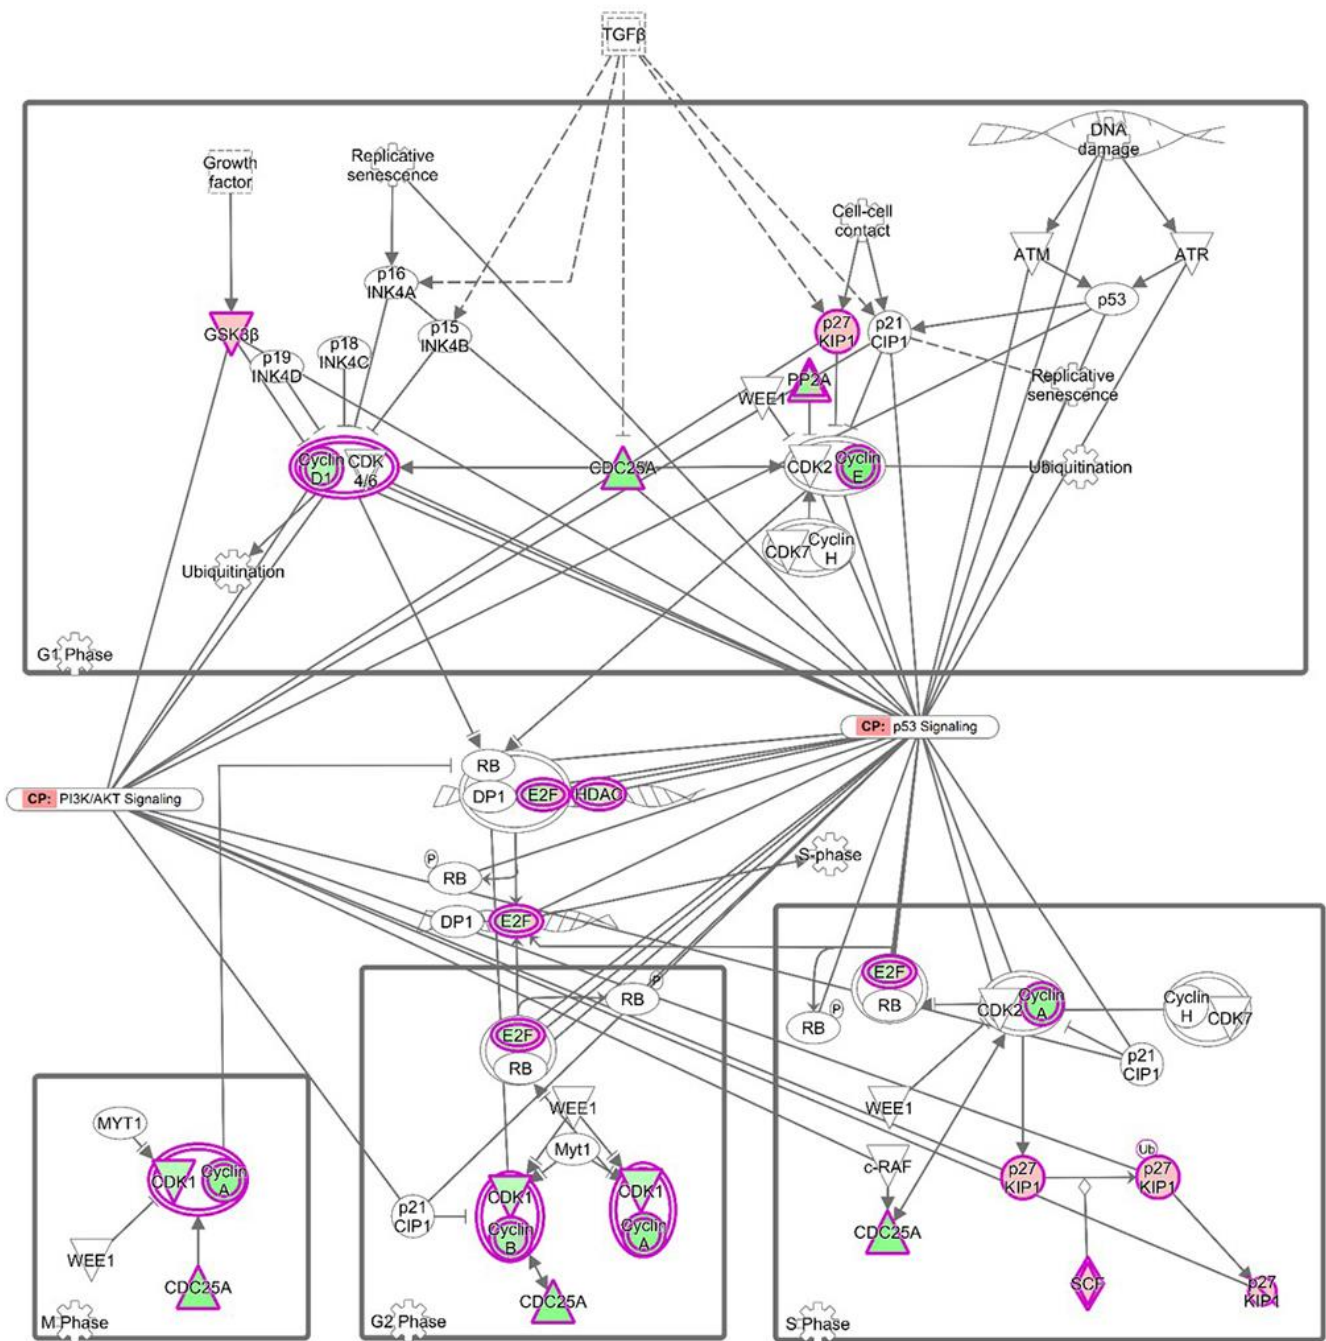

Supplementary Figure 3. The histogram of cyclin and cell cycle regulation pathway.

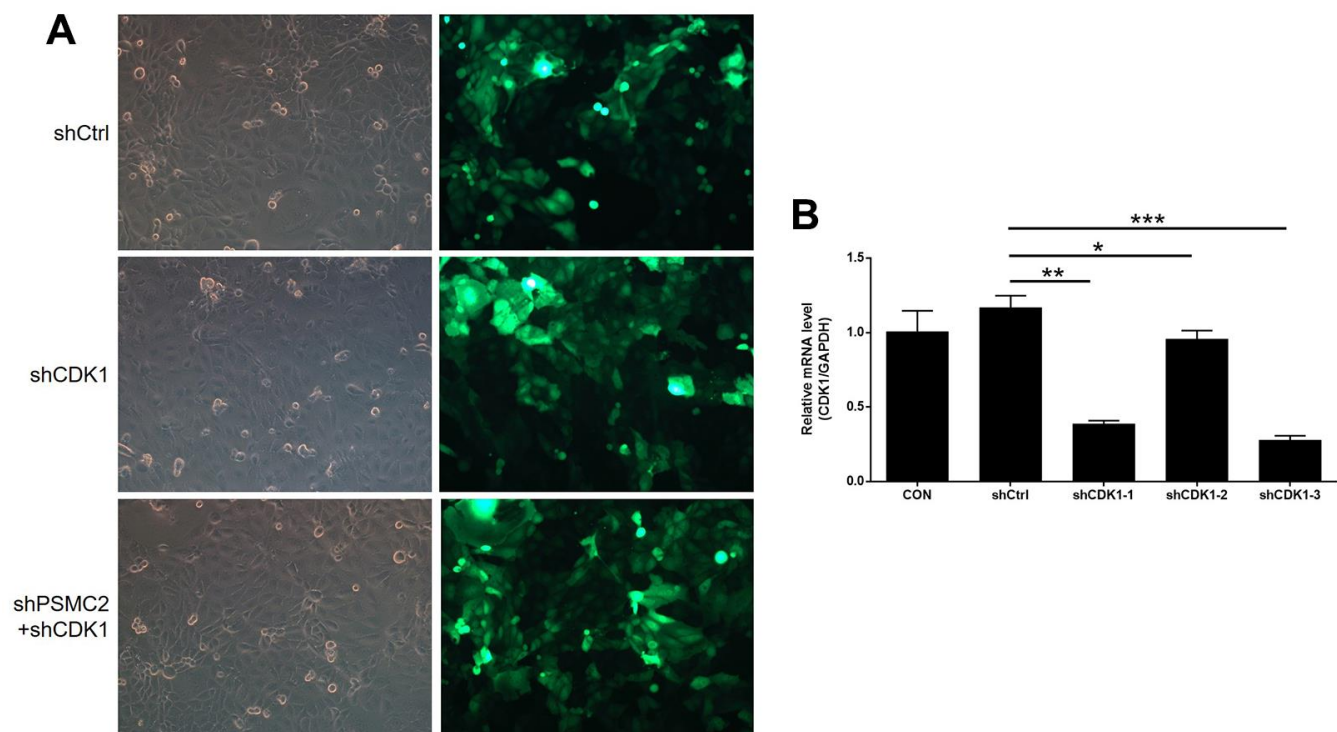

**Supplementary Figure 4.** (A) The transfection efficiencies of shCtrl, shCDK1, shPSMC2+shCDK1 in HCCC-9810 cells were evaluated through observing the fluorescence of GFP on lentivirus vector. (B) The knockdown efficiencies of 3 shRNAs designed for CDK1 knockdown were evaluated by qPCR in HCCC-9810 cells. Data was shown as mean  $\pm$  SD. \* $p < 0.05$ , \*\* $p < 0.01$ , \*\*\* $p < 0.001$ .

**A**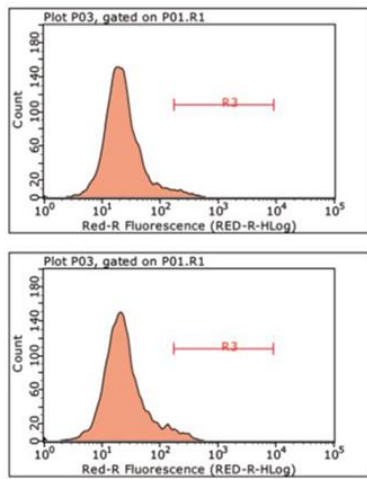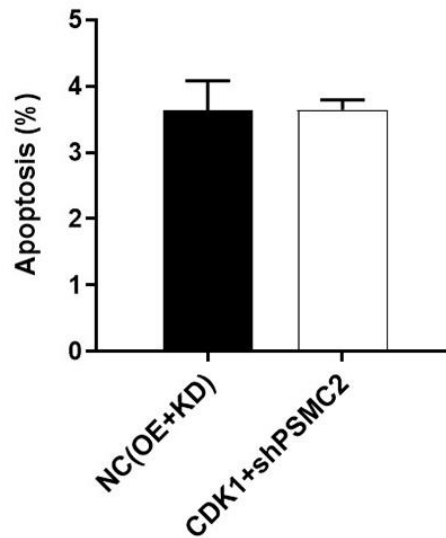**B**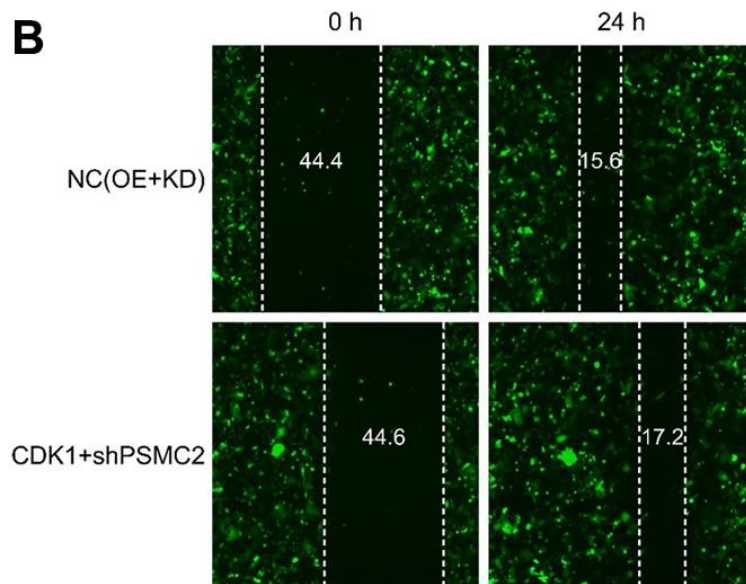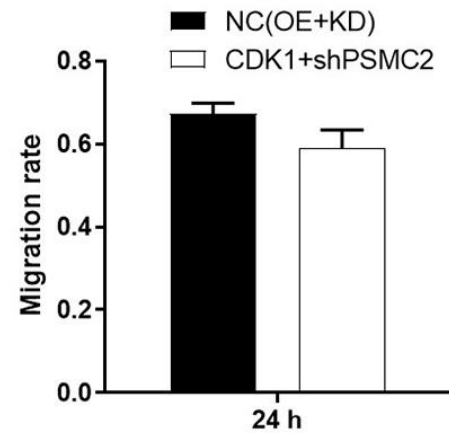

**Supplementary Figure 5.** (A) Flow cytometry was performed to detect the apoptosis of CCA cells with simultaneous CDK1 overexpression and PSMC2 knockdown. (B) Wound-healing assay was carried out to assess cell migration of CCA cells with simultaneous CDK1 overexpression and PSMC2 knockdown. Data was shown as mean  $\pm$  SD.
